# Supplementary material for: Construction of chiral quaternary carbon center via catalytic asymmetric aza-Henry reaction with α-substituted nitroacetates
Source: Royal Society of Chemistry journal article supplement (doi:10.1039/c4ra01390e), 2014-01-01
Supplement: c4ra01390e1.pdf [file c4ra01390e1.pdf]

## Supplementary data

Minghua Li <sup>a</sup>, Nan Ji <sup>a</sup>, Ting Lan <sup>a</sup>, Wei He <sup>a,\*</sup>, Rui Liu <sup>b,\*</sup>

### Table of Contents

1. General
2. <sup>1</sup>H NMR of new compound
3. <sup>13</sup>C NMR
4. Chromatograms data

## 1. General

All the starting materials and reagents were purchased from commercial suppliers and used without further purification. Solvents were purified by standard procedures.  $\text{CH}_2\text{Cl}_2$  and Toluene were freshly distilled prior to use. The reactions were monitored by thin layer chromatography (TLC) and analysis of TLCs was done either via UV light (254 nm) or iodine vapor. NMR spectra were recorded as  $\text{CDCl}_3$  solution on 400MHz instrument. The  $^1\text{H}$  NMR chemical shifts are reported as  $\delta$  value in parts per million (ppm) relative to tetramethylsilane (TMS,  $\delta = 0.00$ )/ $\text{CHCl}_3$  ( $\delta = 7.26$ ) as internal standard. The  $^{13}\text{C}$  NMR chemical shifts are reported as  $\delta$  values in parts per million (ppm) downfield from TMS and referenced with respect to the  $\text{CDCl}_3$  signal (triplet, centerline  $\delta = 77.0$  ppm). The yields are of materials isolated by column chromatography on gel plates, *N*-Boc benzaldimine 2a were synthesized and 2-nitropanoate commercially available. Anhydrous Potassium carbonate was dried in the oven at 110 °C. All glassware was flame-dried under a high vacuum. Low temperature baths were prepared using alcohol. All reactions were conducted in the mixed solvents in flasks fitted with a rubber septum.

## 2. <sup>1</sup>H NMR spectra of the compounds

### 2.1 <sup>1</sup>H NMR of 4a

<sup>1</sup>H NMR (400 MHz, CDCl<sub>3</sub>): δ=7.33(s, 5H), 6.41(d, J=8.4 1H), 5.51(d, J=9.6, 1H), 4.32-4.25(m, 2H), 1.73(s, 3H), 1.38(s, 9H), 1.26-1.22(m, 3H) ppm

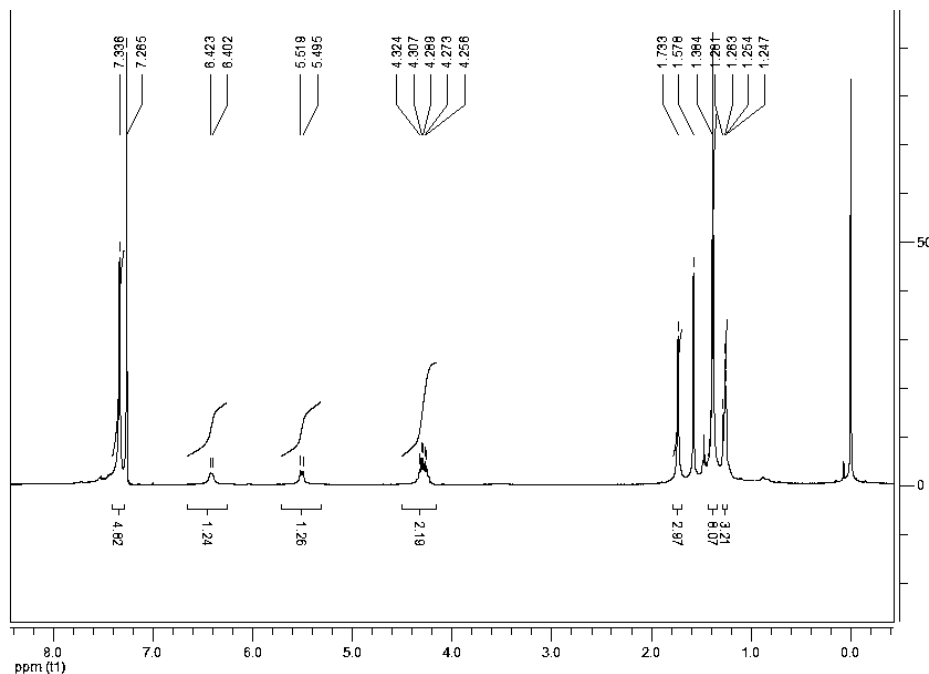

### 2.2 <sup>1</sup>H NMR of 4b

<sup>1</sup>H NMR (400 MHz, CDCl<sub>3</sub>): δ=7.44-7.41(m, 1H), 7.29-7.27 (m, 3H), 6.58(d, J=9.6 1H), 6.24(d, J=9.6, 1H), 4.43-4.32(m, 2H), 1.78(s, 3H), 1.42(s, 9H), 1.37(t, J=7.2, 3H) ppm

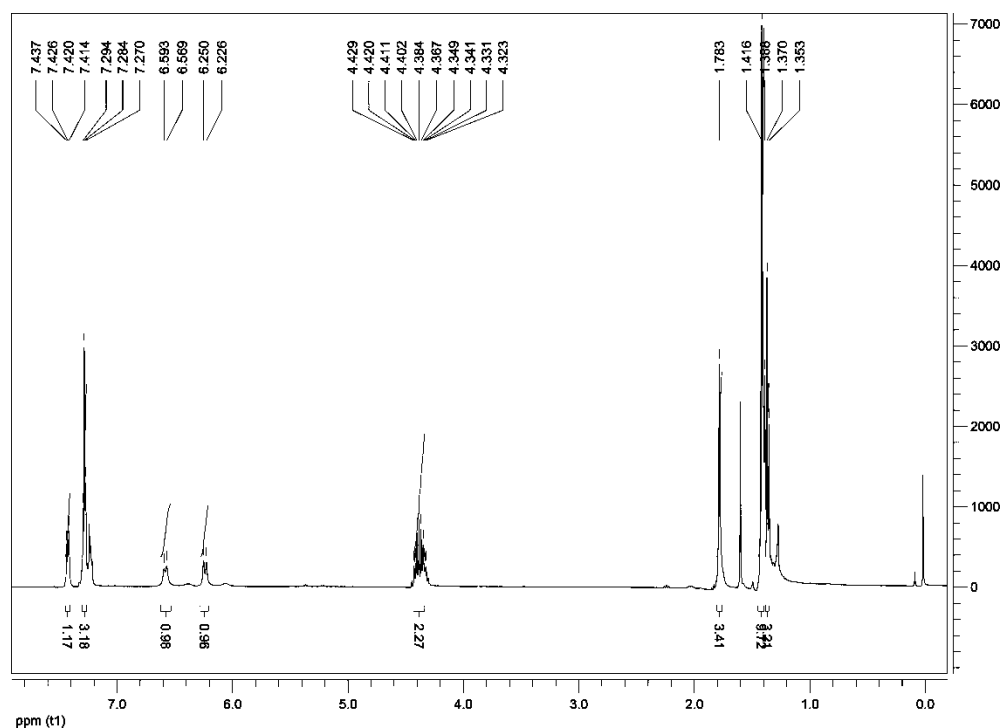

### 2.3 $^1\text{H}$ NMR of 4c

$^1\text{H}$  NMR(400 MHz,  $\text{CDCl}_3$ ):  $\delta$ =7.35-7.30(m, 4H), 6.41-6.39(m, 1H), 5.49-5.47(m, 1H) 4.36-4.24(m,2H), 1.75(s,3H), 1.40(s, 9H), 1.29(t, J=7.2,3H) ppm

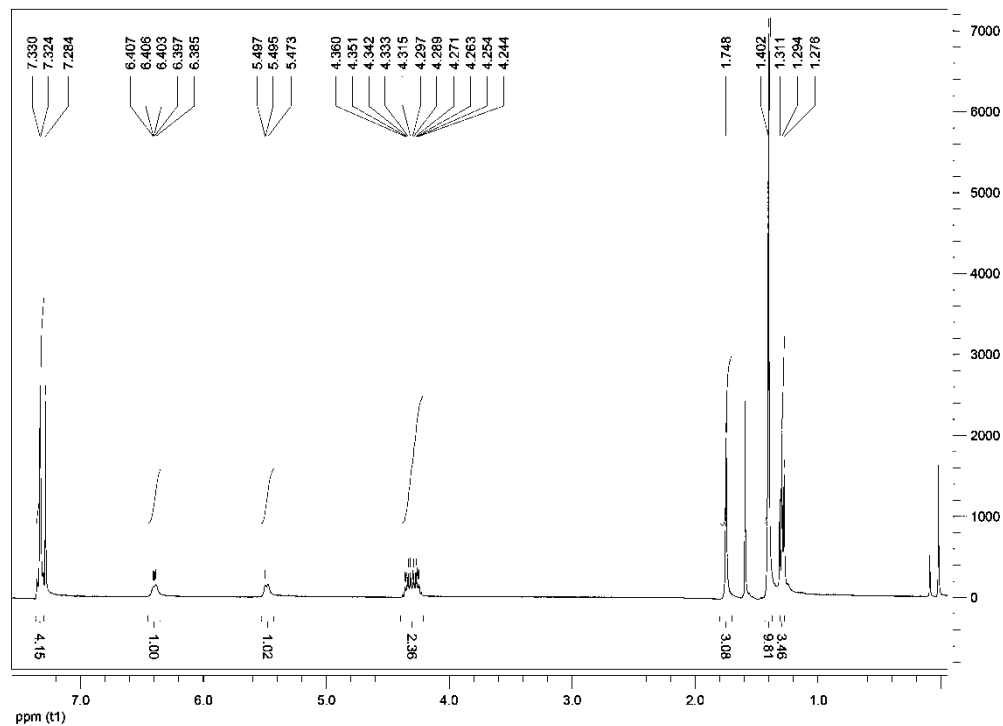

### 2.4 $^1\text{H}$ NMR of 4d

$^1\text{H}$  NMR (400 MHz,  $\text{CDCl}_3$ ):  $\delta$ =7.61 (d, J=8.0, 1H), 7.31 (t, 1H), 7.2 (t, 2H), 6.58 (d, J=9.6, 1H), 6.23 (d, J=9.2, 1H), 4.43-4.31 (m, 2H), 1.80 (s, 3H), 1.42 (s, 9H), 1.37 (t, J=7.2Hz, 3H) ppm;

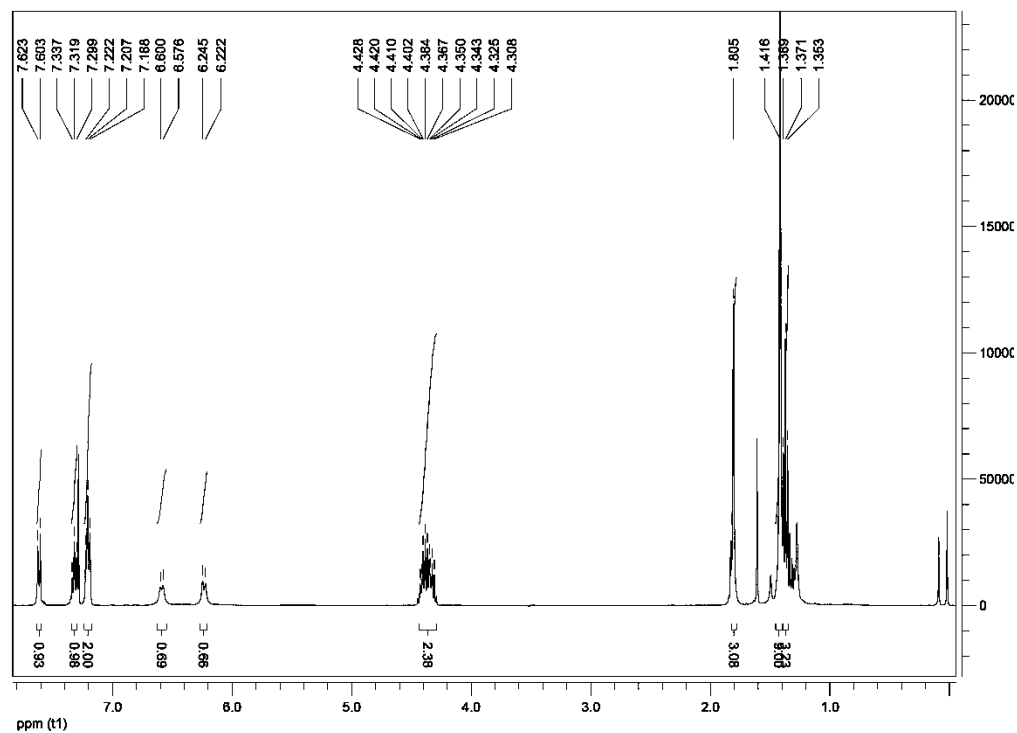

### 2.5 <sup>1</sup>H NMR of 4e

<sup>1</sup>H NMR (400 MHz, CDCl<sub>3</sub>): δ= 7.49 (d, J=8.4, 2H), 7.25 (d, J=8.4, 2H), 6.41-6.39 (m, 1H), 5.48-5.46 (m, 1H), 4.36-4.24 (m, 2H), 1.75 (s, 3H), 1.40 (s, 9H), 1.30 (t, J=7.2Hz, 3H) ppm;

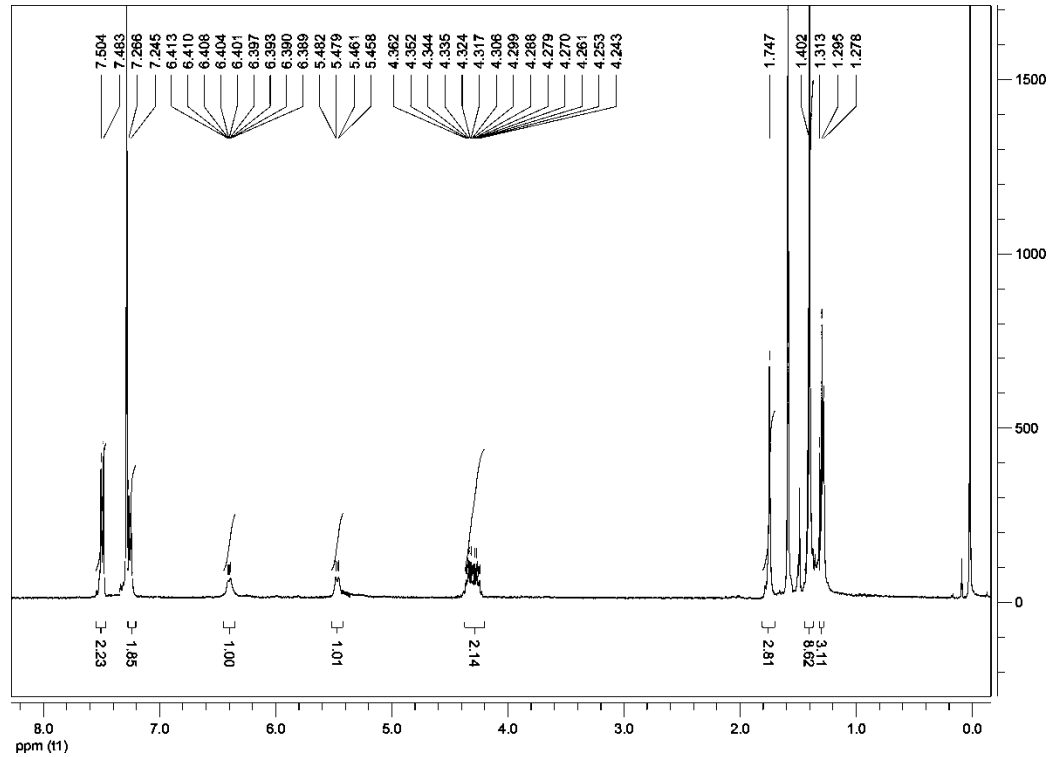

### 2.6 <sup>1</sup>H NMR of 4f

<sup>1</sup>H NMR(400 MHz, CDCl<sub>3</sub>): δ=7.37-7.34(m,2H), 7.06-7.02(m,2H), 6.42-6.36 (m, 1H), 5.50-5.48(m,1H), 4.32-4.29(m,2H), 1.74-1.72(m,3H), 1.40(s,9H),1.30-1.26(m, 3H) ppm;

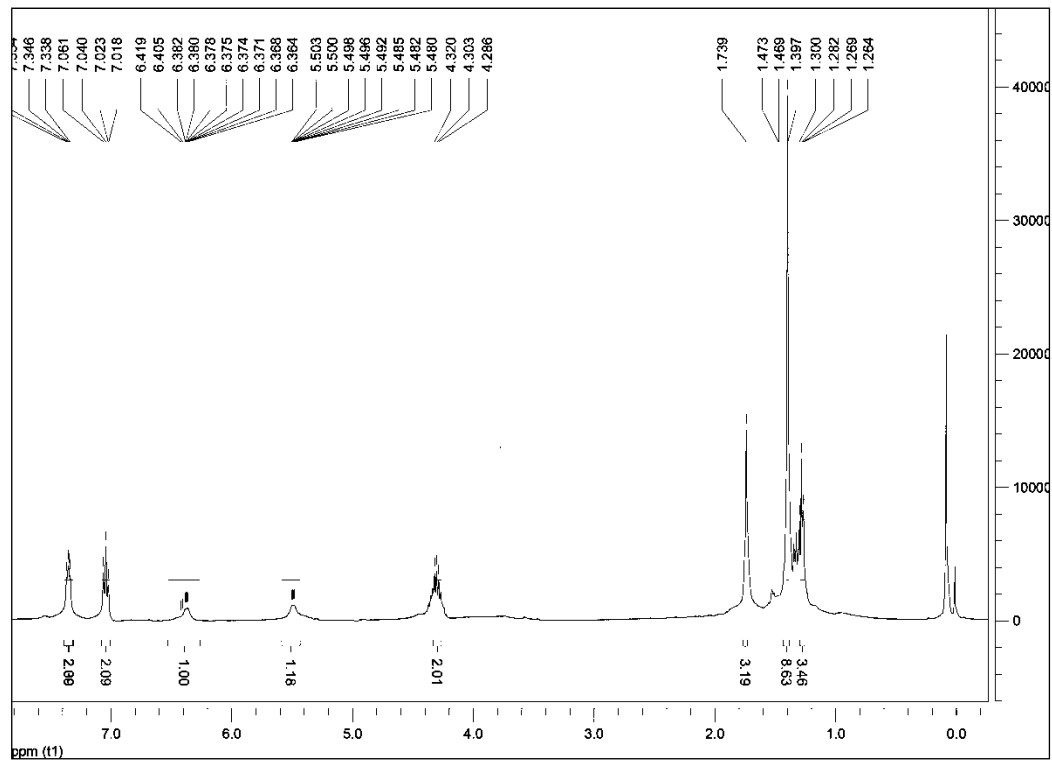

## 2.7 <sup>1</sup>H NMR of 4g

<sup>1</sup>H NMR (400 MHz, CDCl<sub>3</sub>): δ = 7.63 (d, J=8.4, 2H), 7.52 (d, J=8, 2H), 6.46-6.43 (m, 1H), 5.59-5.56(m, 1H), 4.34-4.27 (m, 2H), 1.77 (s, 3H), 1.41 (s, 9H), 1.29 (t, J=7.2Hz, 3H) ppm;

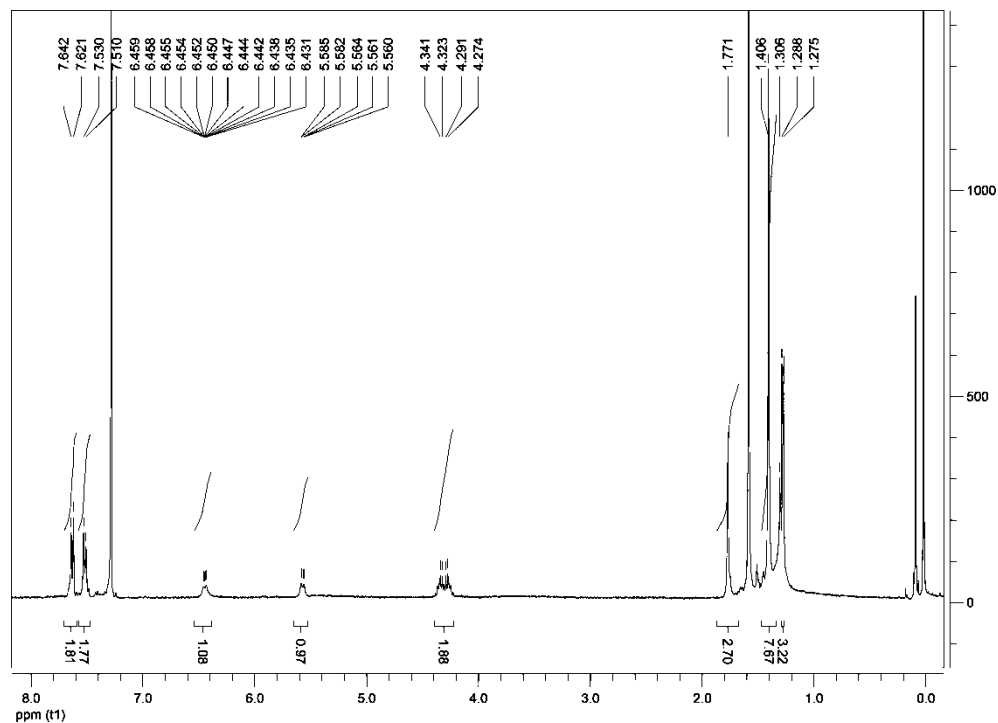

## 2.8 <sup>1</sup>H NMR of 4h

<sup>1</sup>H NMR(400 MHz, CDCl<sub>3</sub>): δ= 7.25-7.21(m,1H), 7.15-7.13(m,3H), 6.41(d, J=8.8, 1H), 5.49(d, J=9.6,1H), 4.33-4.28(m, 2H), 2.36(s,3H), 1.74(s,3H), 1.41(s,9H), 1.29(t, J=7.2Hz, 3H)ppm;

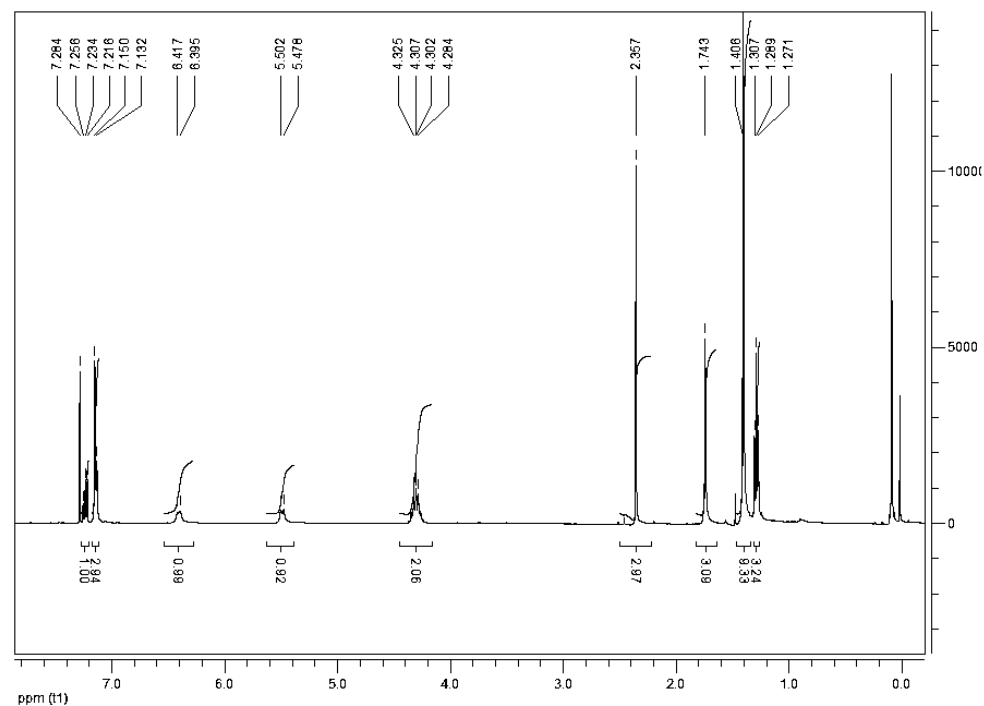

## 2.9 <sup>1</sup>H NMR of 4i

<sup>1</sup>H NMR(400 MHz, CDCl<sub>3</sub>): δ= 7.47(d,J=8, 2H), 7.23(d, J=8, 2H), 6.40(d, J=8.4, 1H), 5.45(d, J=9.2,1H), 4.36-4.21(m, 2H), 1.73(s,3H), 1.66(s,3H), 1.38(s,9H), 1.28(t, J=7.2Hz, 3H)ppm;

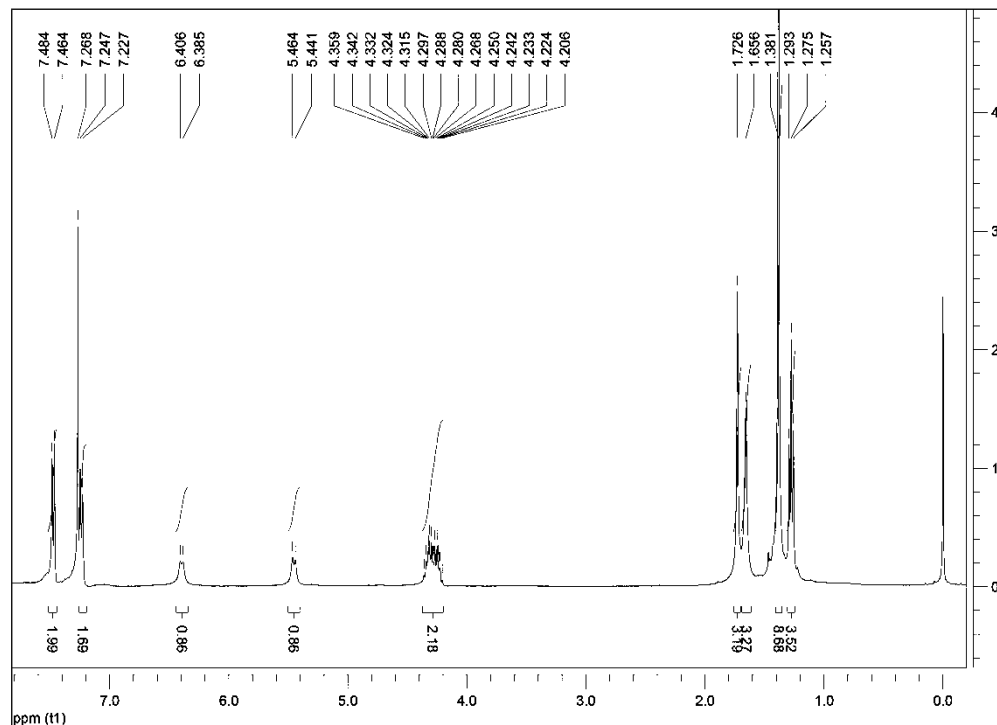

## 2.10 <sup>1</sup>H NMR of 4j

<sup>1</sup>H NMR(400 MHz, CDCl<sub>3</sub>): δ= 7.30(s, 1H), 7.09(s,1H), 7.0-6.97(m, 1H), 6.11(d, J=5.6, 1H), 5.81(d, J=10, 1H), 4.35-4.31(m, 2H), 1.81(s,3H), 1.42(s,9H), 1.31(t, J=7.2, 3H) ppm

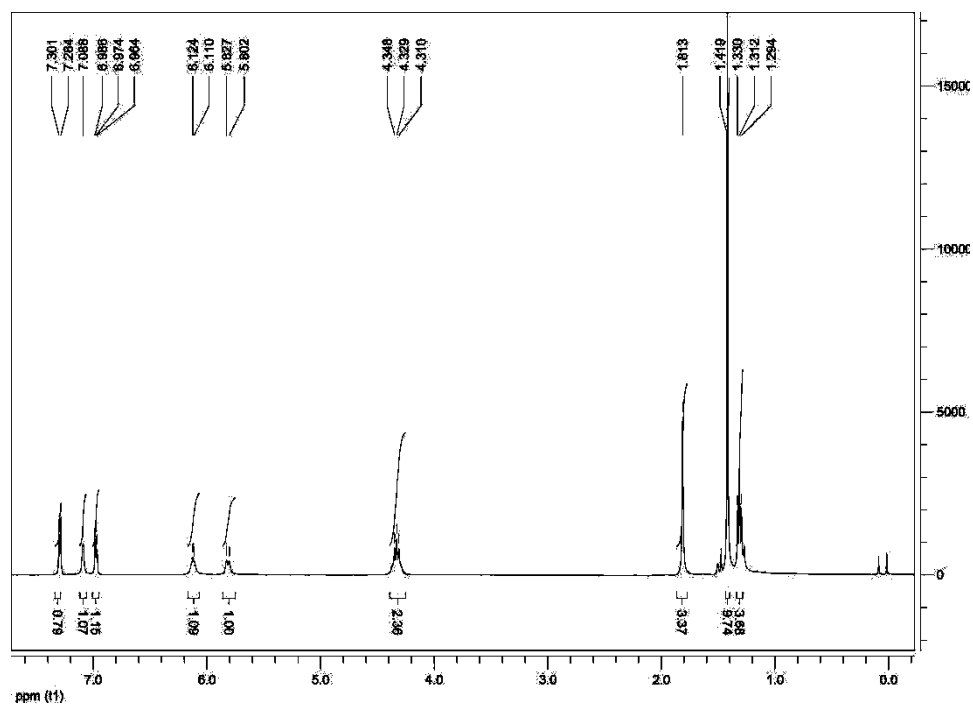

## 2. $^{13}\text{C}$ NMR spectra of the new compounds

### 3.1 $^{13}\text{C}$ NMR of 4a

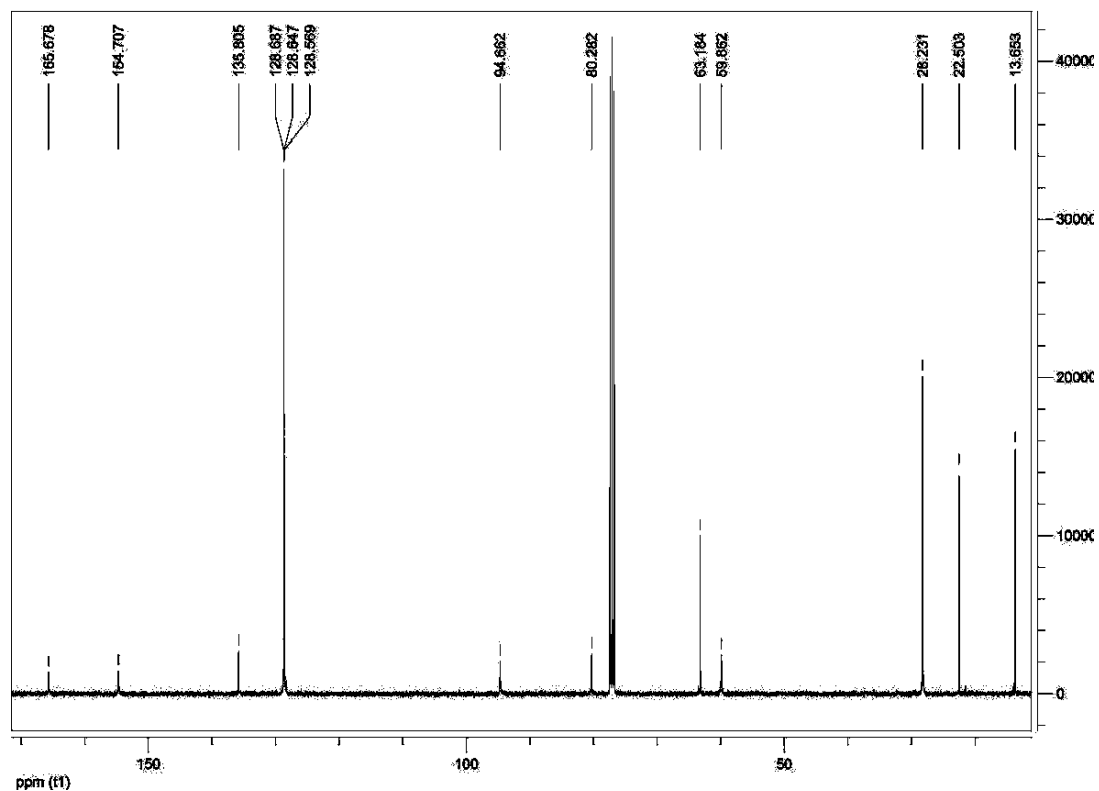

### 3.2 $^{13}\text{C}$ NMR of 4b

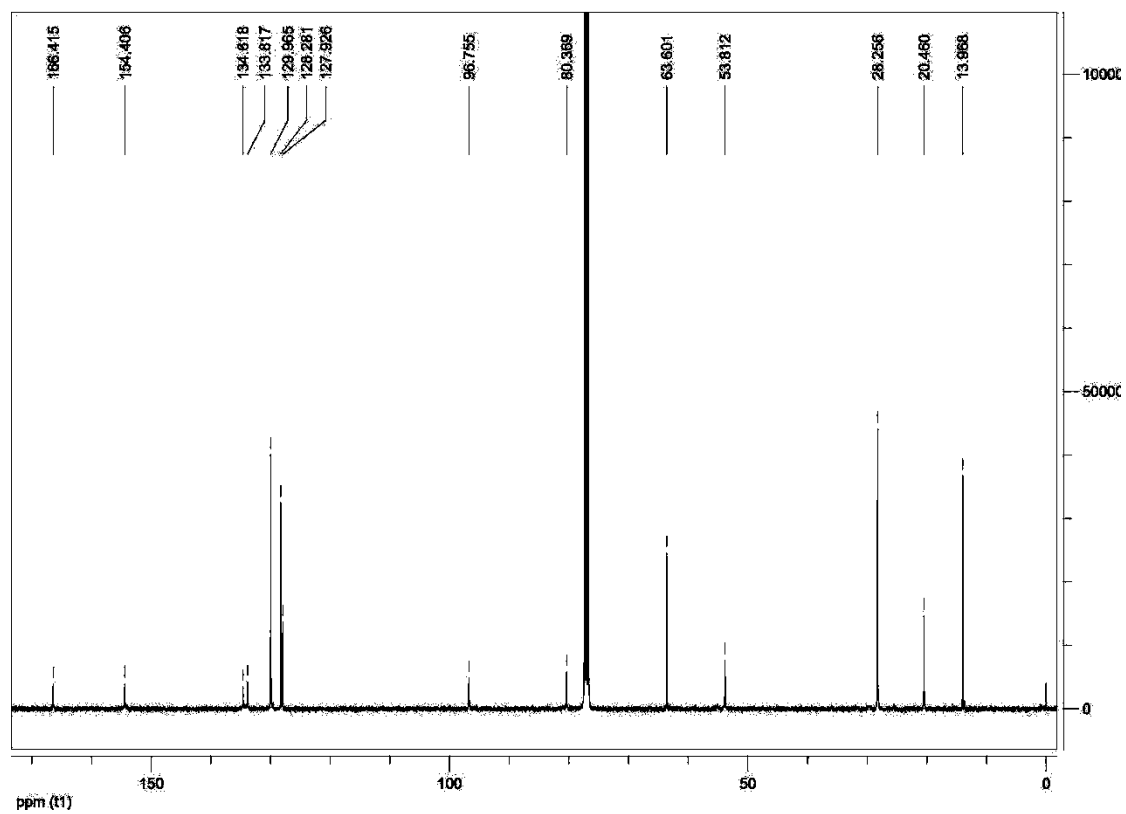



### 3.3 <sup>13</sup>C NMR of 4c

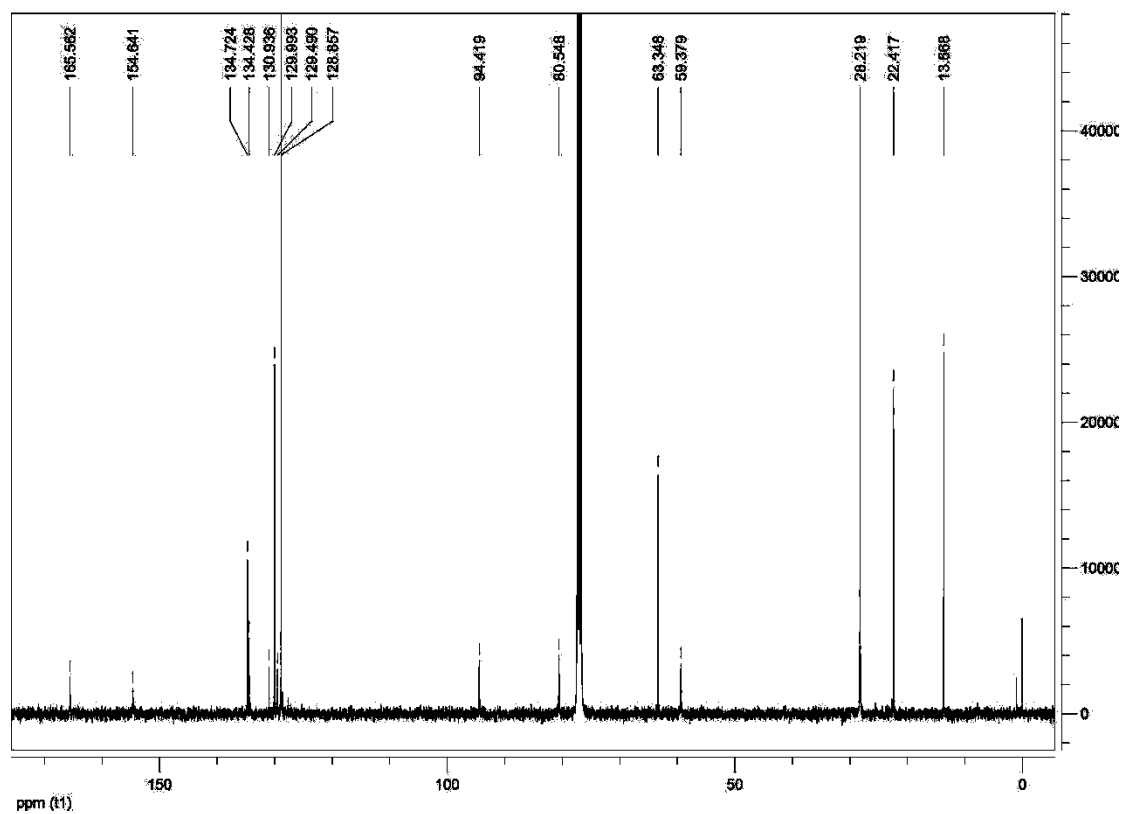

### 3.1 <sup>13</sup>C NMR of 4d

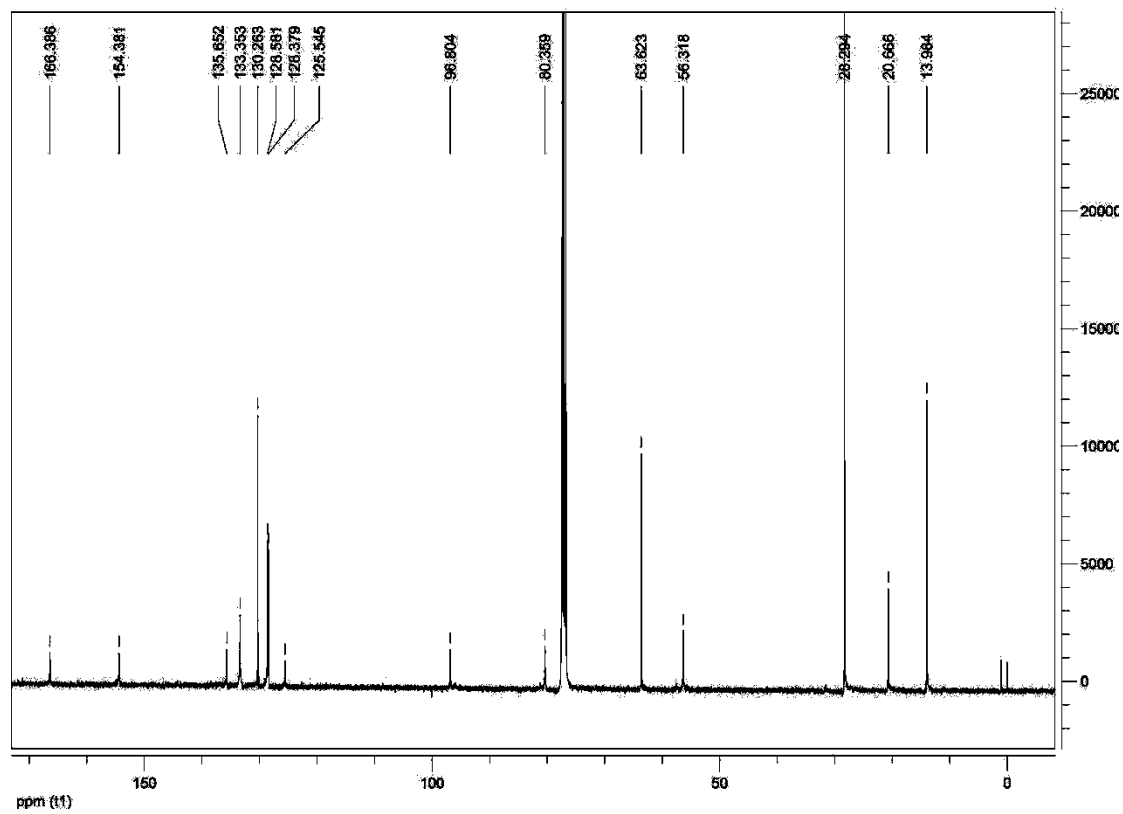

### 3.2 <sup>13</sup>C NMR of 4e

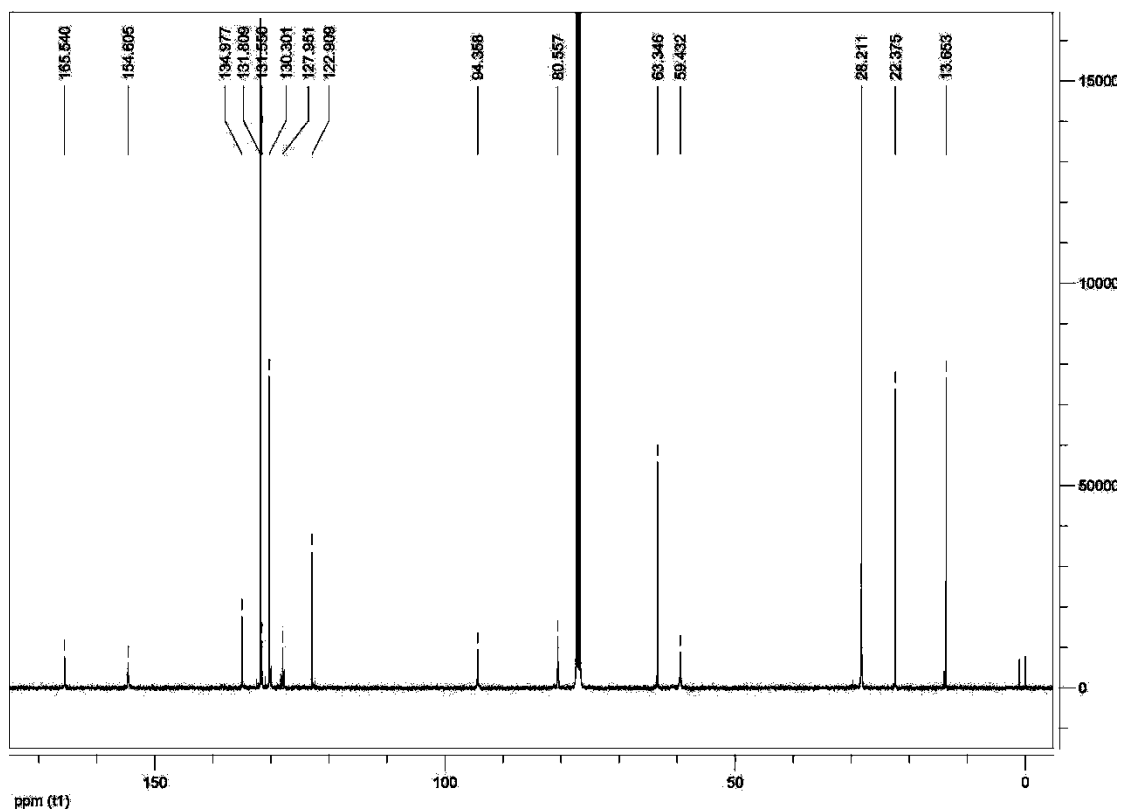

3.3 <sup>13</sup>C NMR of 4g

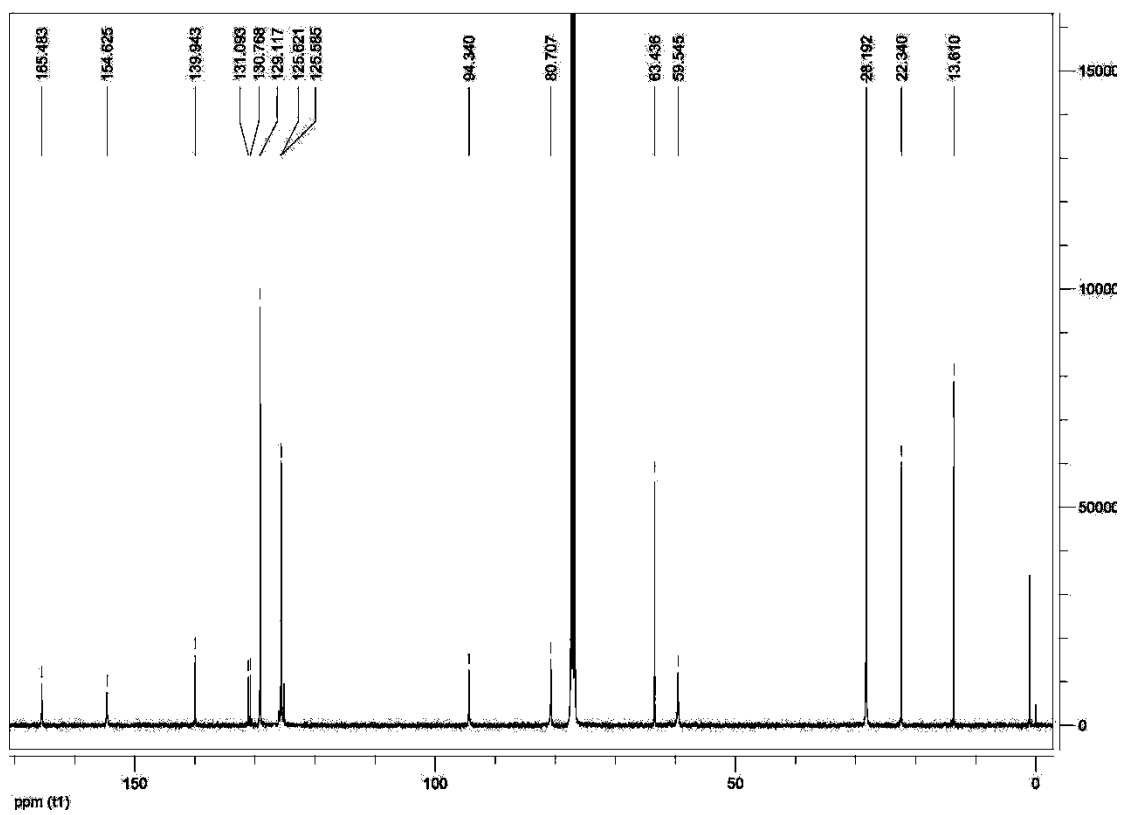

3.4 <sup>13</sup>C NMR of 4h

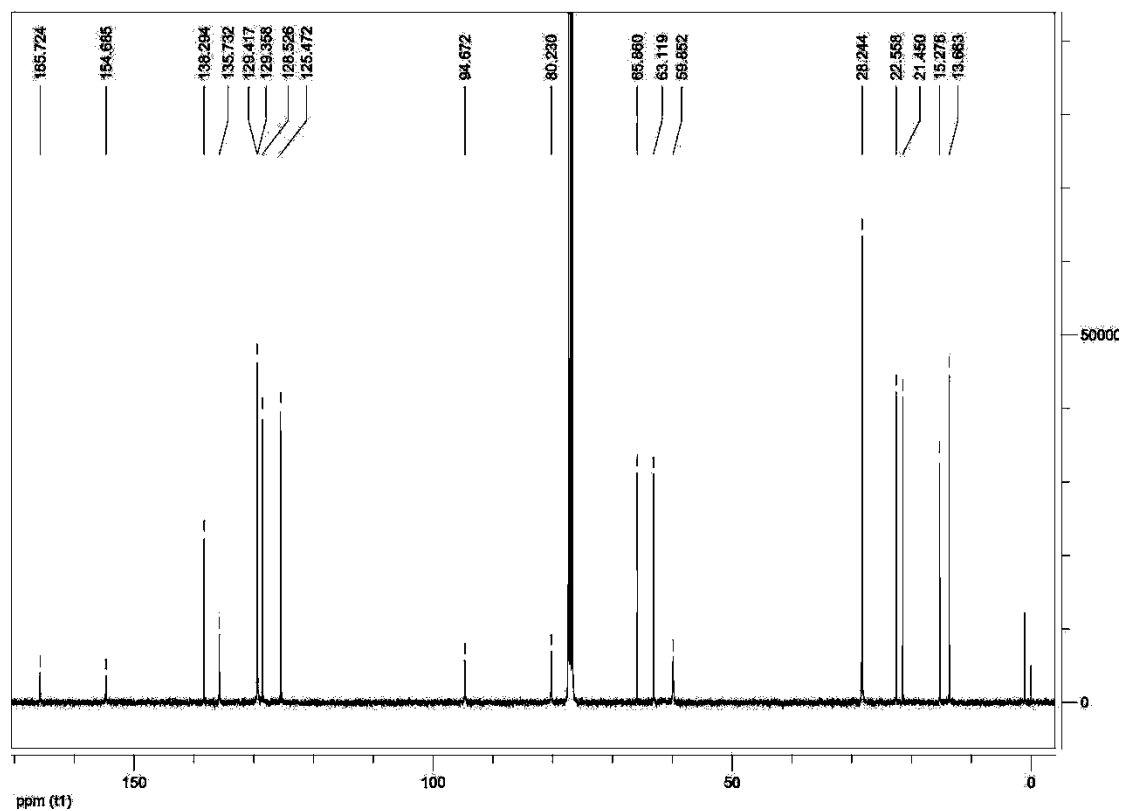

3.1  $^{13}\text{C}$  NMR of 4j

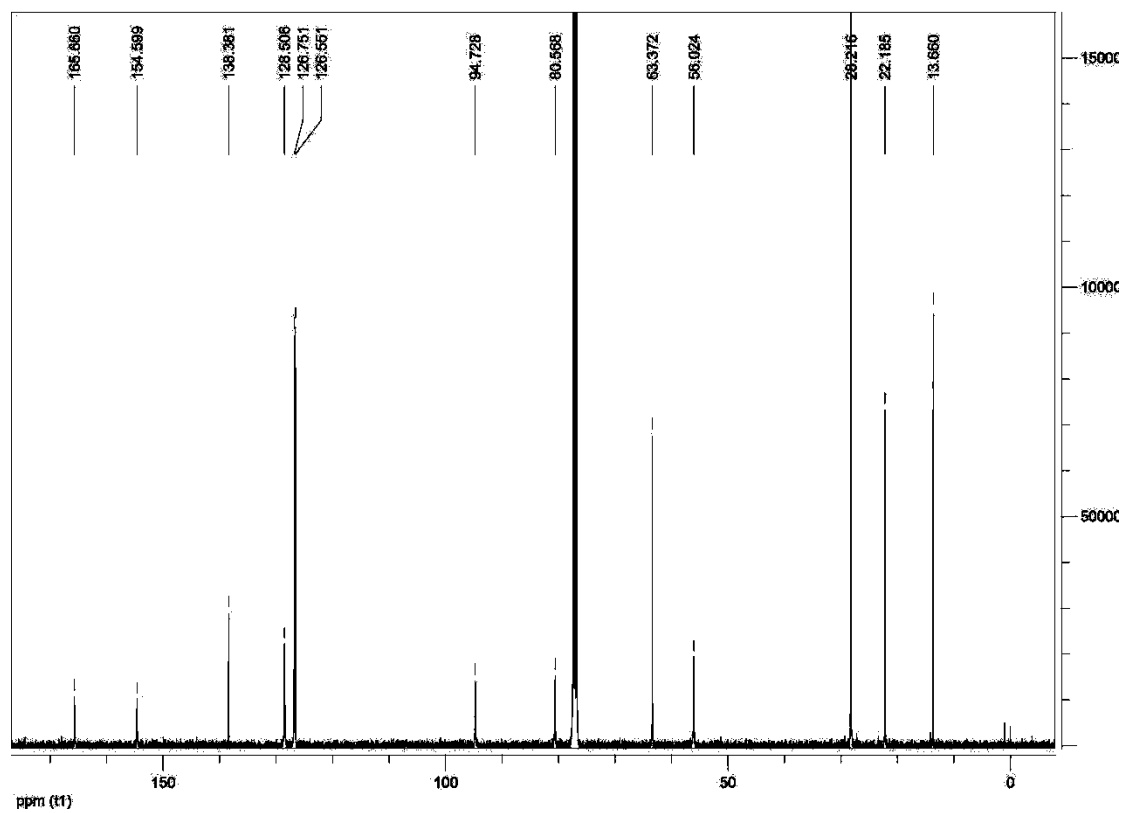

## 4. Chromatograms date

### 4.1 HPLC for 4a

HPLC analysis (Chiralpak AD-H column, n-hexane/2-propanol =90:10, flow rate = 1.0mL/min, wavelength = 220 nm),  $t_{\text{major}}=10.63\text{min}$ ,  $t_{\text{minor}}=7.02\text{min}$ .  $[\alpha]_D^{20} -11.8(\text{in EtOH})$

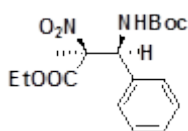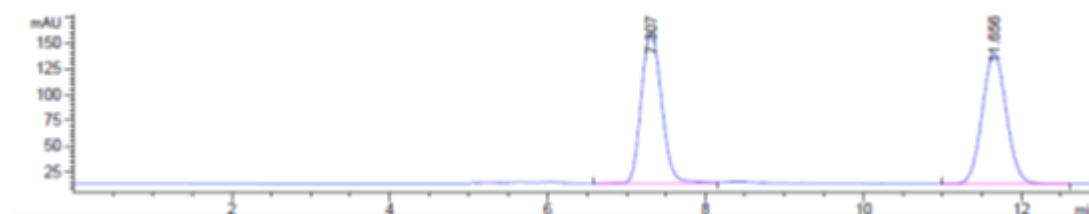

| 峰 # | 保留时间 [min] | 类型 | 峰宽 [min] | 峰面积 [mAU*s] | 峰高 [mAU]  | 峰面积 %   |
|-----|------------|----|----------|-------------|-----------|---------|
| 1   | 7.307      | BV | 0.2940   | 2638.50098  | 143.86443 | 49.4795 |
| 2   | 11.656     | BB | 0.3276   | 2694.01563  | 126.95264 | 50.5205 |

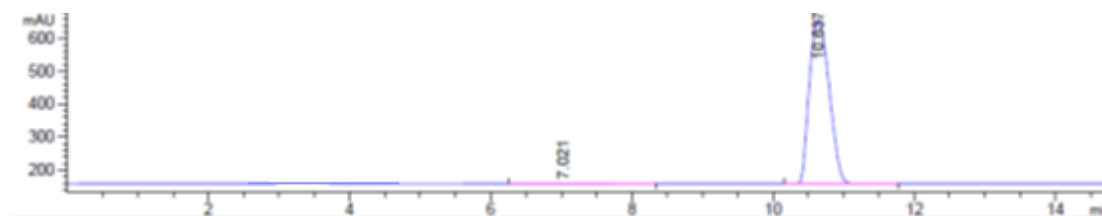

| 峰 # | 保留时间 [min] | 类型 | 峰宽 [min] | 峰面积 [mAU*s] | 峰高 [mAU]   | 峰面积 %   |
|-----|------------|----|----------|-------------|------------|---------|
| 1   | 7.021      | VB | 0.7963   | 53.75355    | 8.20549e-1 | 0.5516  |
| 2   | 10.637     | VB | 0.3231   | 9691.72852  | 497.82156  | 99.4484 |

### 4.2 HPLC for 4b

HPLC analysis (Chiralpak AD-H column, n-hexane/2-propanol =90:10, flow rate = 1.0mL/min, wavelength = 220 nm),  $t_{\text{major}}=8.68\text{min}$ ,  $t_{\text{minor}}=6.68\text{min}$ .  $[\alpha]_D^{20} +7.7(\text{in EtOH})$

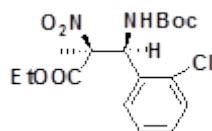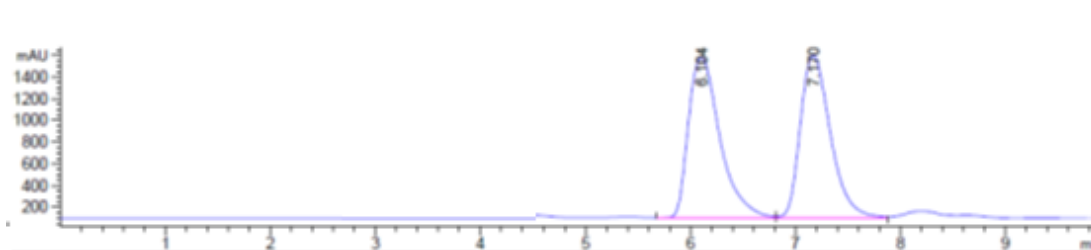

| 峰 # | 保留时间 [min] | 类型 | 峰宽 [min] | 峰面积 [mAU*s] | 峰高 [mAU]   | 峰面积 %   |
|-----|------------|----|----------|-------------|------------|---------|
| 1   | 6.104      | BV | 0.3238   | 3.07966e4   | 1473.93555 | 50.8158 |
| 2   | 7.170      | VV | 0.3127   | 2.98077e4   | 1494.33838 | 49.1842 |

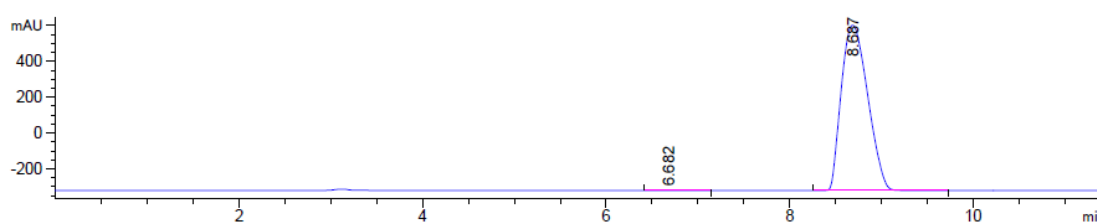

| 峰 # | 保留时间 [min] | 类型 | 峰宽 [min] | 峰面积 [mAU*s] | 峰高 [mAU]   | 峰面积 %   |
|-----|------------|----|----------|-------------|------------|---------|
| 1   | 6.682      | VB | 0.2077   | 8.94087     | 6.21838e-1 | 0.0485  |
| 2   | 8.687      | BB | 0.3250   | 1.84246e4   | 922.52832  | 99.9515 |

#### 4.3 HPLC for 4c

HPLC analysis (Chiralpak AD-H column, n-hexane/2-propanol =90:10, flow rate = 1.0mL/min, wavelength = 220 nm),  $t_{\text{major}}=14.73\text{min}$ ,  $t_{\text{minor}}=7.40\text{min}$ .  $[\alpha]_D^{20} -22.7$ (in EtOH)

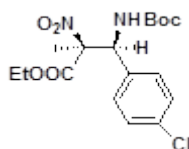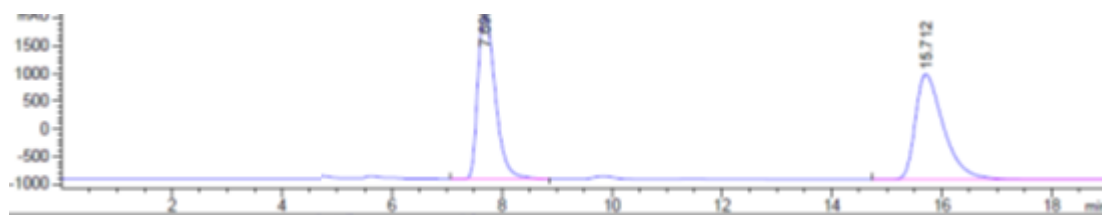

| 峰 # | 保留时间 [min] | 类型  | 峰宽 [min] | 峰面积 [mAU*s] | 峰高 [mAU]   | 峰面积 %   |
|-----|------------|-----|----------|-------------|------------|---------|
| 1   | 7.690      | BV  | 0.3471   | 6.56887e4   | 2957.82007 | 49.2209 |
| 2   | 15.712     | BBA | 0.5360   | 6.77682e4   | 1900.57263 | 50.7791 |

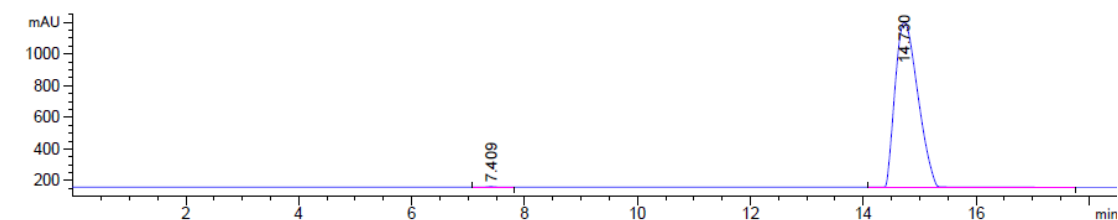

| 峰 # | 保留时间 [min] | 类型 | 峰宽 [min] | 峰面积 [mAU*s] | 峰高 [mAU]   | 峰面积 %   |
|-----|------------|----|----------|-------------|------------|---------|
| 1   | 7.409      | BB | 0.1558   | 39.15602    | 3.68980    | 0.1347  |
| 2   | 14.730     | BB | 0.4452   | 2.90382e4   | 1041.89771 | 99.8653 |

#### 4.4 HPLC for 4d

HPLC analysis (Chiralpak AD-H column, n-hexane/2-propanol =90:10, flow rate = 1.0mL/min, wavelength = 220 nm),  $t_{\text{major}}=9.40\text{min}$ ,  $t_{\text{minor}}=7.03\text{min}$ .  $[\alpha]_D^{20}+11.3(\text{in EtOH})$

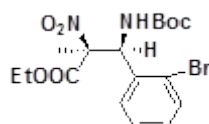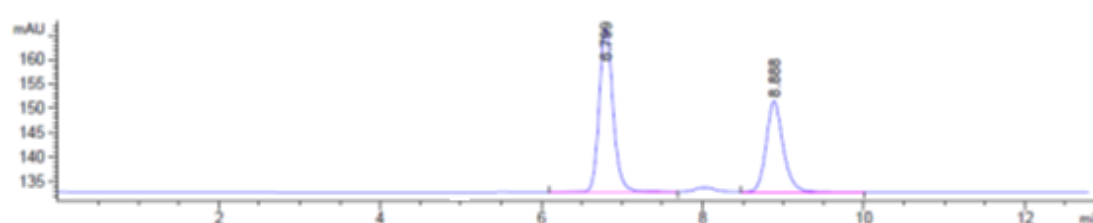

| 峰 # | 保留时间 [min] | 类型 | 峰宽 [min] | 峰面积 [mAU*s] | 峰高 [mAU] | 峰面积 %   |
|-----|------------|----|----------|-------------|----------|---------|
| 1   | 6.799      | BV | 0.1909   | 408.23831   | 33.32938 | 59.5548 |
| 2   | 8.888      | VB | 0.2294   | 277.24557   | 18.65189 | 40.4452 |

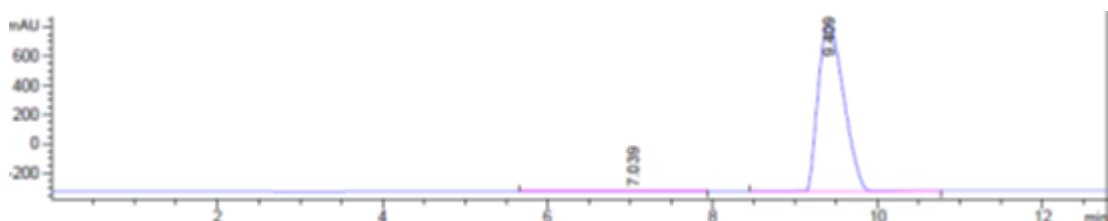

| 峰 # | 保留时间 [min] | 类型 | 峰宽 [min] | 峰面积 [mAU*s] | 峰高 [mAU]   | 峰面积 %   |
|-----|------------|----|----------|-------------|------------|---------|
| 1   | 7.039      | VV | 0.4509   | 37.31470    | 1.05944    | 0.1531  |
| 2   | 9.409      | BB | 0.3465   | 2.43387e4   | 1133.32007 | 99.8469 |

#### 4.5 HPLC for 4e

HPLC analysis (Chiralpak AD-H column, n-hexane/2-propanol =90:10, flow rate = 1.0mL/min, wavelength = 220 nm),  $t_{\text{major}}=16.06\text{min}$ ,  $t_{\text{minor}}=7.94\text{min}$ .  $[\alpha]_D^{20} -24.5(\text{in EtOH})$

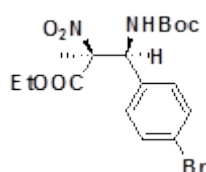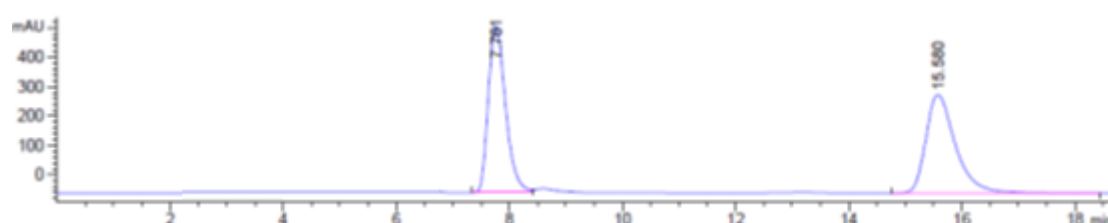

| 峰 # | 保留时间 [min] | 类型  | 峰宽 [min] | 峰面积 [mAU*s] | 峰高 [mAU]  | 峰面积 %   |
|-----|------------|-----|----------|-------------|-----------|---------|
| 1   | 7.761      | BV  | 0.3289   | 1.20583e4   | 565.30280 | 49.9300 |
| 2   | 15.580     | BBA | 0.5507   | 1.20921e4   | 333.74338 | 50.0700 |

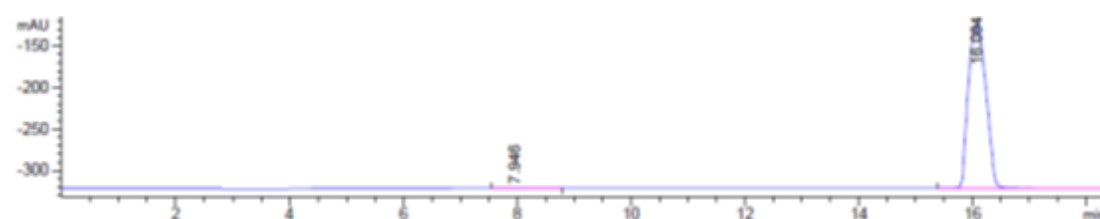

| 峰 # | 保留时间 [min] | 类型  | 峰宽 [min] | 峰面积 [mAU*s] | 峰高 [mAU]   | 峰面积 %   |
|-----|------------|-----|----------|-------------|------------|---------|
| 1   | 7.946      | VV  | 0.5789   | 23.27891    | 5.57742e-1 | 0.5464  |
| 2   | 16.064     | BBA | 0.3712   | 4236.89209  | 196.81137  | 99.4536 |

#### 4.6 HPLC for 4f

HPLC analysis (Chiralpak AD-H column, n-hexane/2-propanol =90:10, flow rate = 1.0mL/min, wavelength = 220 nm),  $t_{\text{major}}=12.63\text{min}$ ,  $t_{\text{minor}}=6.80\text{min}$ .  $[\alpha]_D^{20} -7.4(\text{in EtOH})$

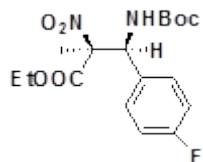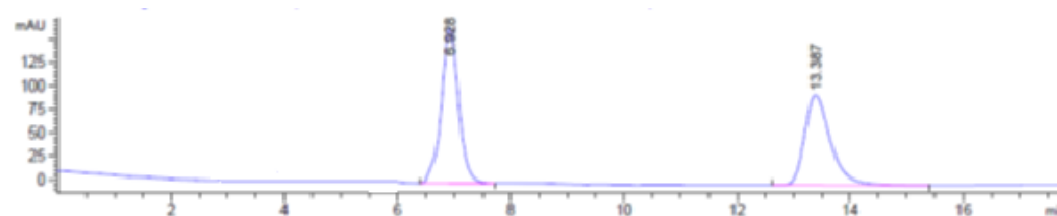

| 峰 # | 保留时间 [min] | 类型 | 峰宽 [min] | 峰面积 [mAU*s] | 峰高 [mAU]  | 峰面积 %   |
|-----|------------|----|----------|-------------|-----------|---------|
| 1   | 6.928      | BB | 0.3230   | 3521.99585  | 165.00012 | 53.6590 |
| 2   | 13.387     | BB | 0.4825   | 3041.67261  | 95.77389  | 46.3410 |

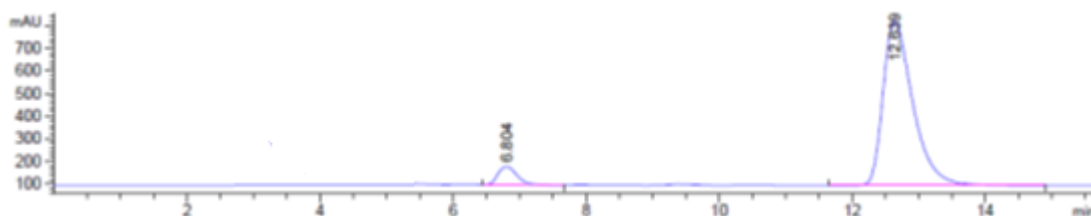

| 峰 # | 保留时间 [min] | 类型 | 峰宽 [min] | 峰面积 [mAU*s] | 峰高 [mAU] | 峰面积 %   |
|-----|------------|----|----------|-------------|----------|---------|
| 1   | 6.805      | BB | 0.3101   | 165.09378   | 8.44515  | 5.5299  |
| 2   | 12.639     | BB | 0.4480   | 2820.37061  | 96.20542 | 94.4701 |

#### 4.7 HPLC for 4g

HPLC analysis (Chiralpak AD-H column, n-hexane/2-propanol =90:10, flow rate = 1.0mL/min, wavelength = 220 nm),  $t_{\text{major}}=11.95\text{min}$ ,  $t_{\text{minor}}=8.89\text{min}$ .  $[\alpha]_D^{20}$ -12.3(in EtOH)

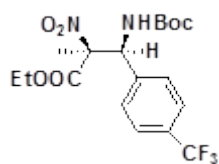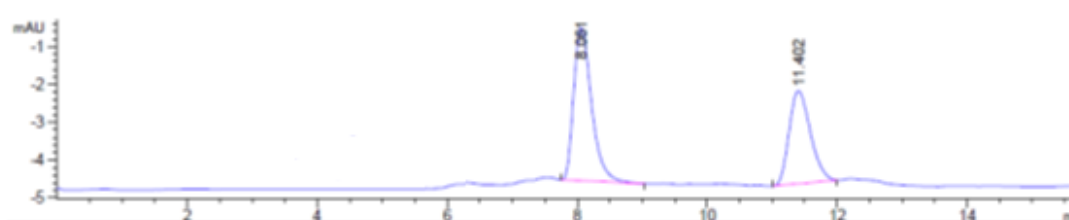



| 峰 # | 保留时间 [min] | 类型 | 峰宽 [min] | 峰面积 [mAU*s] | 峰高 [mAU] | 峰面积 %   |
|-----|------------|----|----------|-------------|----------|---------|
| 1   | 8.061      | BB | 0.2952   | 77.19666    | 4.03475  | 58.0206 |
| 2   | 11.402     | BB | 0.3494   | 55.85385    | 2.45541  | 41.9794 |

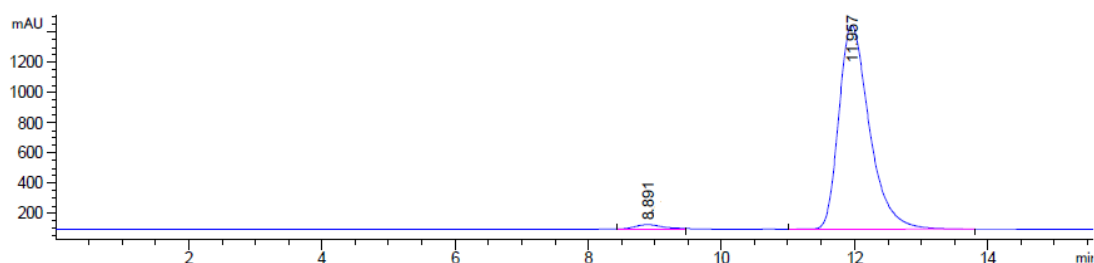

| 峰 # | 保留时间 [min] | 类型 | 峰宽 [min] | 峰面积 [mAU*s] | 峰高 [mAU]   | 峰面积 %   |
|-----|------------|----|----------|-------------|------------|---------|
| 1   | 8.891      | MM | 0.4774   | 838.75311   | 29.28064   | 1.9112  |
| 2   | 11.957     | BB | 0.4880   | 4.30479e4   | 1350.00024 | 98.0888 |

#### 4.8 HPLC for 4h

HPLC analysis (Chiralpak AD-H column, n-hexane/2-propanol =90:10, flow rate = 1.0mL/min, wavelength = 220 nm),  $t_{major}$ =9.10min,  $t_{minor}$ =5.89min.  $[\alpha]_D^{20}$ -9.6(in EtOH)

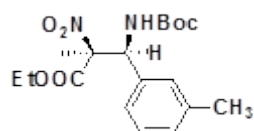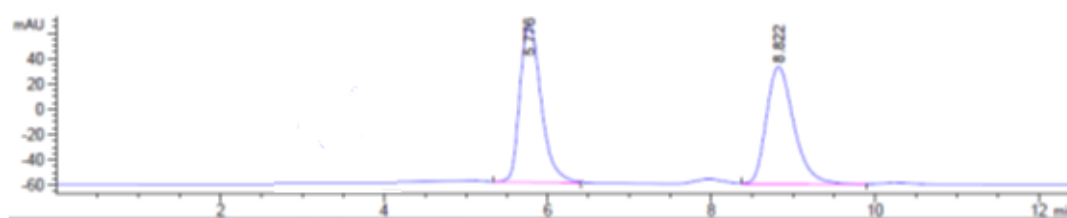

| 峰 # | 保留时间 [min] | 类型 | 峰宽 [min] | 峰面积 [mAU*s] | 峰高 [mAU]  | 峰面积 %   |
|-----|------------|----|----------|-------------|-----------|---------|
| 1   | 5.776      | BV | 0.2843   | 2259.08081  | 124.15626 | 50.9619 |
| 2   | 8.822      | VV | 0.3623   | 2173.79810  | 92.46334  | 49.0381 |

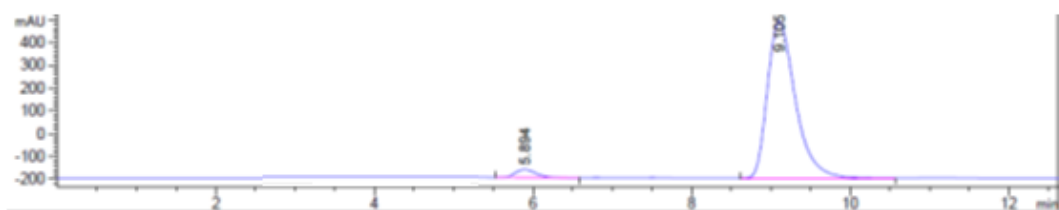

| 峰 # | 保留时间 [min] | 类型 | 峰宽 [min] | 峰面积 [mAU*s] | 峰高 [mAU]  | 峰面积 %   |
|-----|------------|----|----------|-------------|-----------|---------|
| 1   | 5.894      | BB | 0.2940   | 641.55316   | 34.65016  | 3.6609  |
| 2   | 9.105      | BB | 0.3790   | 1.68831e4   | 686.27600 | 96.3391 |

#### 4.9 HPLC for 4i

HPLC analysis (Chiralpak AD-H column, n-hexane/2-propanol =90:10, flow rate = 1.0mL/min, wavelength = 220 nm),  $t_{\text{major}}=9.07\text{min}$ ,  $t_{\text{minor}}=6.55\text{min}$ .  $[\alpha]_D^{20} -19.0(\text{in EtOH})$

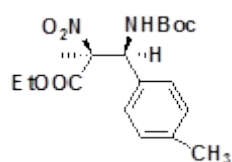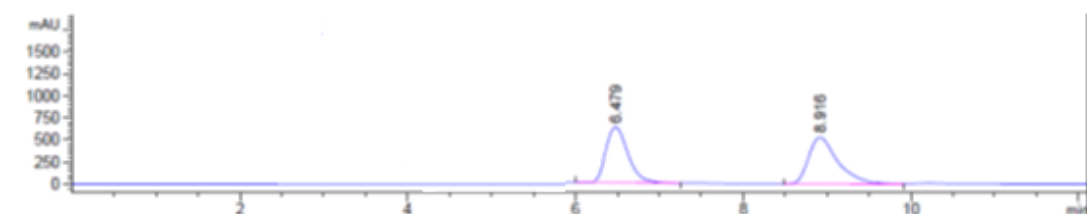

| 峰 # | 保留时间 [min] | 类型 | 峰宽 [min] | 峰面积 [mAU*s] | 峰高 [mAU]  | 峰面积 %   |
|-----|------------|----|----------|-------------|-----------|---------|
| 1   | 6.479      | MM | 0.3486   | 1.12620e4   | 538.41895 | 50.4396 |
| 2   | 8.917      | MM | 0.4133   | 1.10657e4   | 446.25443 | 49.5604 |

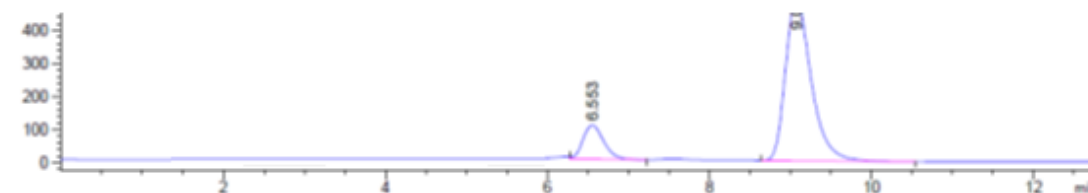

| 峰 # | 保留时间 [min] | 类型 | 峰宽 [min] | 峰面积 [mAU*s] | 峰高 [mAU]  | 峰面积 %   |
|-----|------------|----|----------|-------------|-----------|---------|
| 1   | 6.553      | VB | 0.2799   | 1849.34717  | 102.79500 | 14.6670 |
| 2   | 9.073      | BB | 0.3363   | 1.07595e4   | 489.78241 | 85.3330 |

#### 4.10 HPLC for 4j

HPLC analysis (Chiralpak AD-H column, n-hexane/2-propanol =90:10, flow rate = 1.0mL/min, wavelength = 220 nm),  $t_{\text{major}}=10.25$  min,  $t_{\text{minor}}=6.65$  min.  $[\alpha]_D^{20} -38.1$  (in EtOH)

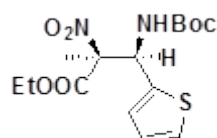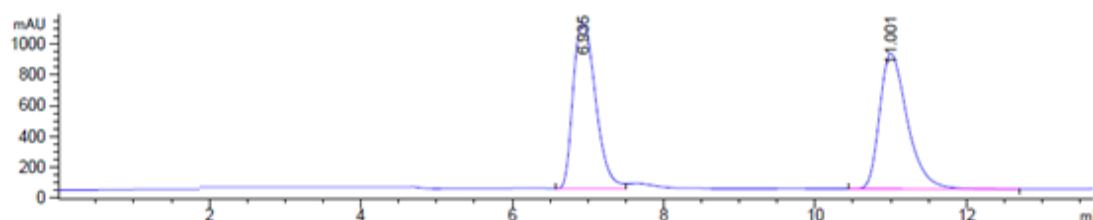

| 峰 # | 保留时间 [min] | 类型 | 峰宽 [min] | 峰面积 [mAU*s] | 峰高 [mAU]   | 峰面积 %   |
|-----|------------|----|----------|-------------|------------|---------|
| 1   | 6.935      | BV | 0.3302   | 2.22215e4   | 1070.45862 | 49.8368 |
| 2   | 11.001     | BB | 0.3908   | 2.23671e4   | 879.12732  | 50.1632 |

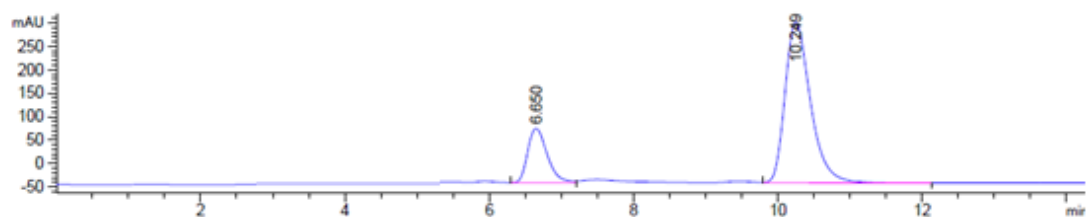

| 峰 # | 保留时间 [min] | 类型 | 峰宽 [min] | 峰面积 [mAU*s] | 峰高 [mAU]  | 峰面积 %   |
|-----|------------|----|----------|-------------|-----------|---------|
| 1   | 6.649      | MM | 0.3021   | 2241.29980  | 123.65408 | 19.7163 |
| 2   | 10.249     | VB | 0.3733   | 9126.44043  | 373.16492 | 80.2837 |
